# Supplementary material for: GMBP1-conjugated manganese oxide nanoplates for in vivo monitoring of gastric cancer MDR using magnetic resonance imaging
Source: Royal Society of Chemistry journal article supplement (doi:10.1039/d0ra00897d), 2020-01-01
Supplement: d0ra00897d1.pdf [file d0ra00897d1.pdf]

## Supporting Information

# GMBP1-conjugated Manganese Oxide Nanoplates for in vivo Monitoring of Gastric Cancer MDR using Magnetic Resonance Imaging

Wenhua Zhan<sup>1,2†</sup>, Xiaoxia Cai<sup>3†</sup>, Hairui Li<sup>3</sup>, Getao Du<sup>3</sup>, Hao Hu<sup>4</sup>, Yayan Wu<sup>1</sup> and Lin Wang<sup>5\*</sup>

<sup>1</sup> Key Laboratory of Biomedical Information Engineering of Education Ministry, School of Life Science and Technology, Xi'an Jiaotong University, Xi'an 710049, Shaanxi, China; zhanwhgood@163.com (W.Z.); wuyayan@mail.xjtu.edu.cn (Y.W.)

<sup>2</sup> Department of Radiation oncology, General Hospital of Ningxia Medical University, Yinchuan 750004, Ningxia, China; zhanwhgood@163.com

<sup>3</sup> Engineering Research Center of Molecular & Neuro Imaging of the Ministry of Education, School of Life Science and Technology, Xidian University, Xi'an 710071, Shaanxi, China; c18392638127@163.com (X.C.); hrli330@163.com (H.L.); dgt199518@163.com (G.D.)

<sup>4</sup> Endoscopic Center of Zhongshan Hospital, Fudan University, Shanghai 200032, China; hu.hao1@zs-hospital.sh.cn

<sup>5</sup> School of Information Sciences and Technology, Northwest University, Xi'an 710127, Shaanxi, China

\* Correspondence: wanglinmig@gmail.com; Tel.: +86-29-88308119

† This author contributed equally to this work

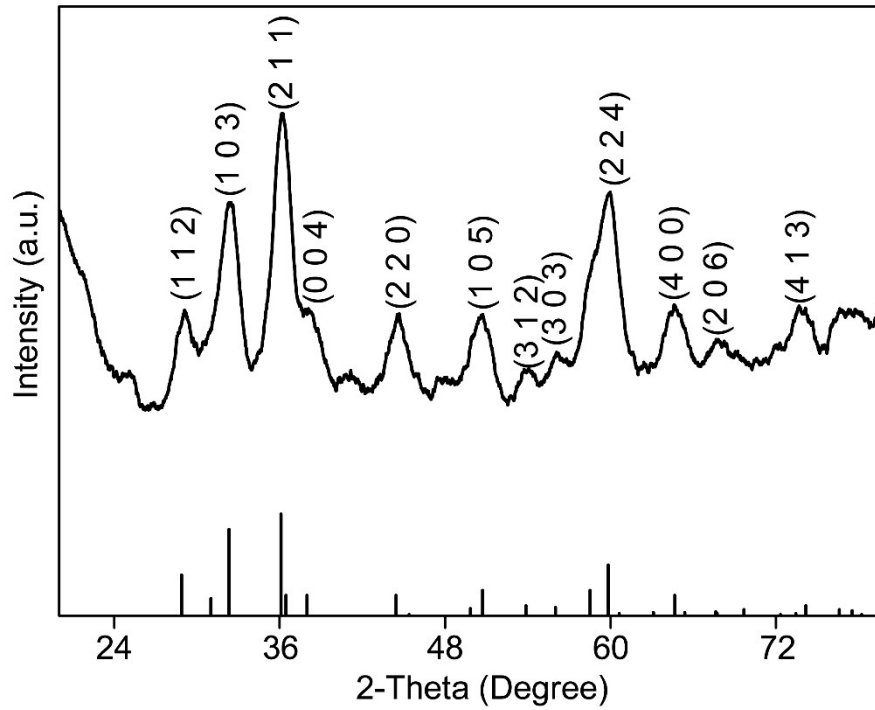

**Figure S1** X-ray diffraction pattern of Mn<sub>3</sub>O<sub>4</sub> nanoplates.

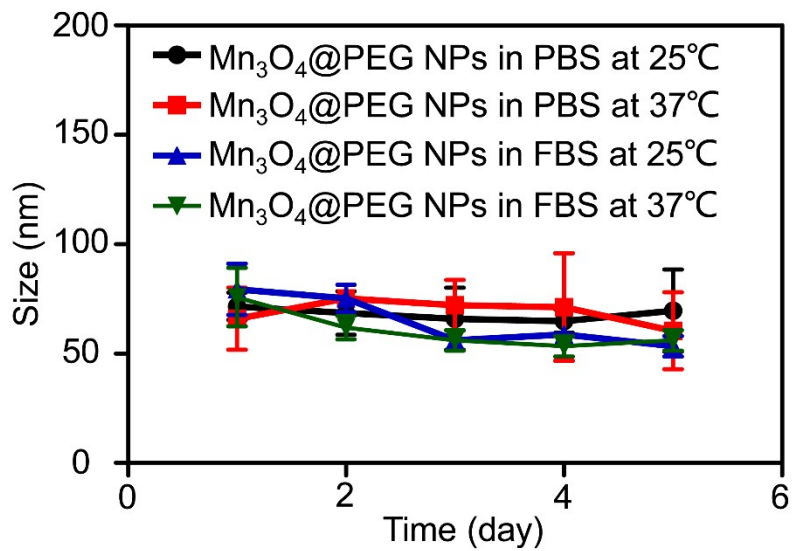

**Figure S2** Hydrodynamic size of the Mn<sub>3</sub>O<sub>4</sub>@PEG at different time periods in PBS and 10%FBS at different temperatures.

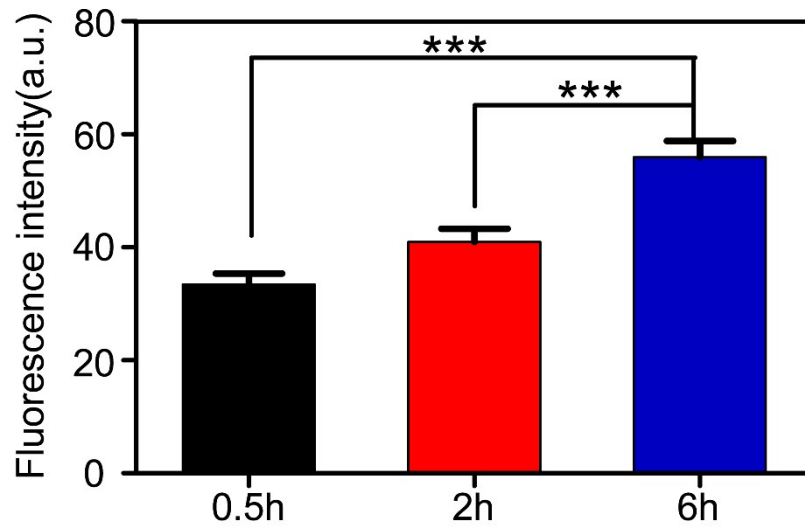

**Figure S3** The quantitative analysis of fluorescence intensity for  $\text{Mn}_3\text{O}_4$ @PEG-GMBP1 NPs in SGC7901/ADR cells at 0.5, 2, and 6 h. \*\*\* $p < 0.01$ ;  $n=3$ .

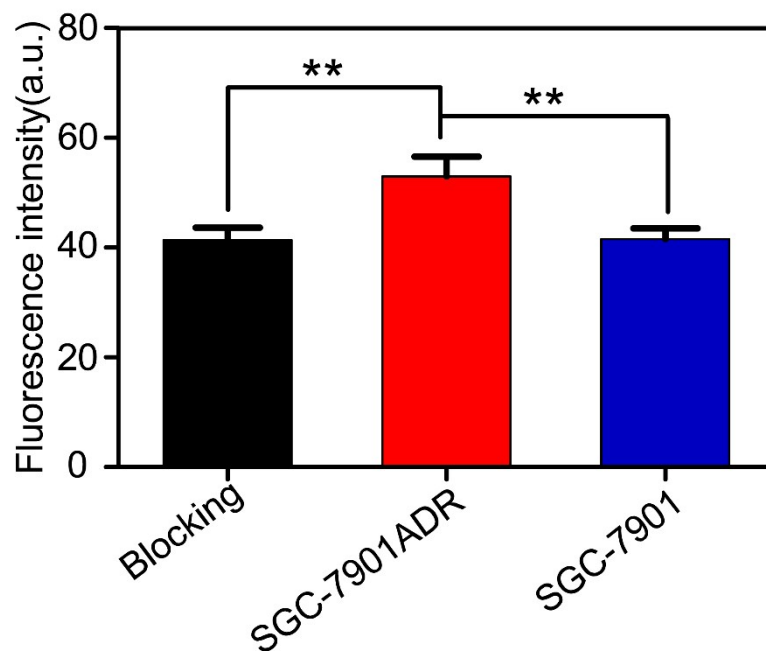

**Figure S4** The quantitative analysis of fluorescence intensity for  $\text{Mn}_3\text{O}_4$ @PEG-GMBP1 NPs in SGC7901/ADR, SGC7901, and GMBP1-blocking SGC7901/ADR cells. \*\* $p < 0.05$ ;  $n=3$ .
